# Supplementary material for: Synthesis, characterization and electrical properties of La0.7Sr0.3Co0.2Fe0.8O3/Gd–CeO2 thin films (≤500 nm)
Source: Royal Society of Chemistry journal article supplement (doi:10.1039/c3ta14505k), 2014-01-01
Supplement: c3ta14505k1.pdf [file c3ta14505k1.pdf]

Supplementary Information

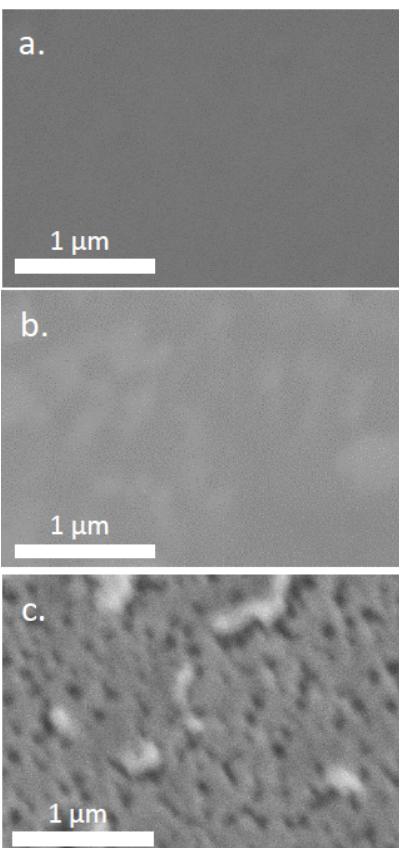

**Figure S1** : SEM micrographs of 200 nm Pt strips (a) after deposition and heated at (b) 300°C and (c) 700°C in air during 5h.

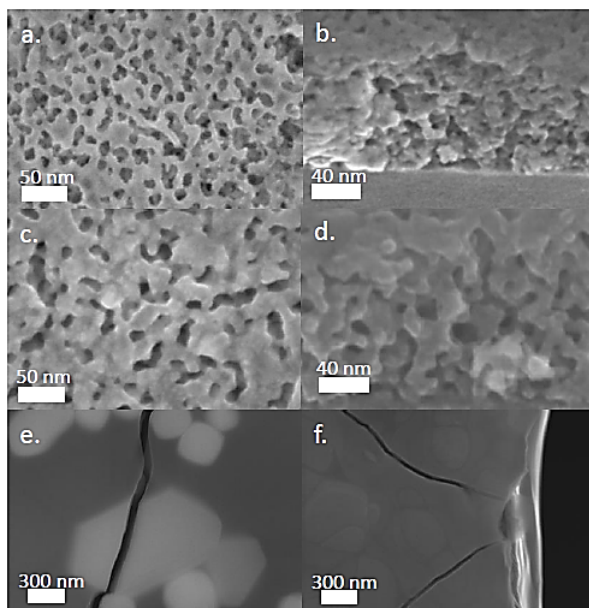

**Figure S2**: FE-SEM micrographs of LSCF50/50GDC calcined at 500°C (a,b), 700°C (c,d), and 1200°C (e,f) in air during 5h.

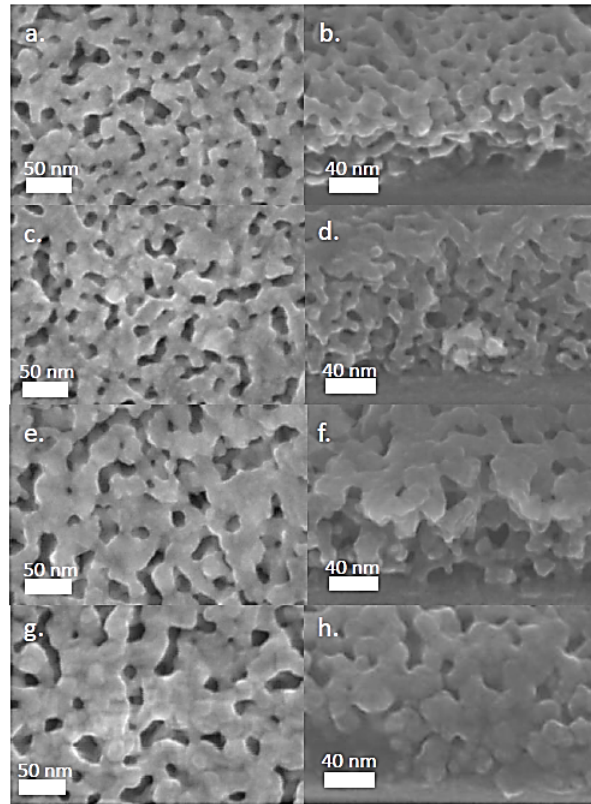

**Figure S3:** FE-SEM micrographs of LSCF<sub>x</sub>/yGDC calcined at 700°C in air during 5h with volumetric % of LSCF 30% (a,b), 50% (c,d), 70% (e,f) and 100% (g,h).

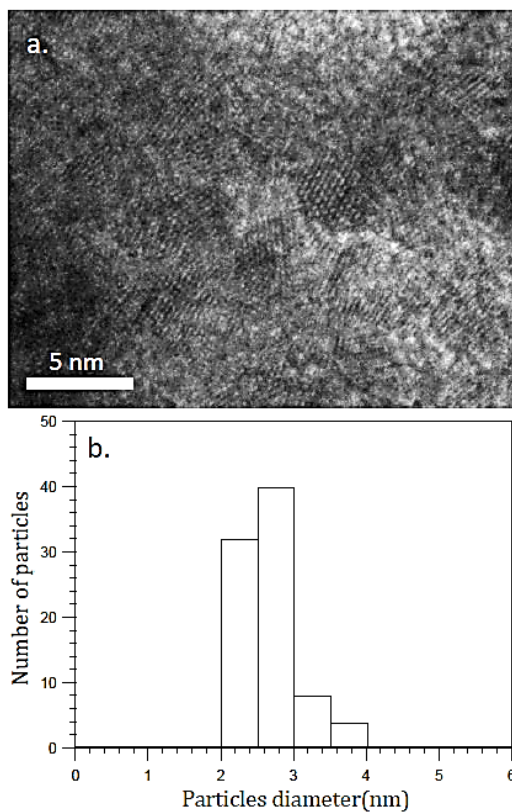

**Figure S4.** **a.** HR-TEM images of mesostructured, LSCF50/50GDC composite films heat-treated at 500°C, **b.** Distribution of the mean diameter of the nanoparticles evaluated from the HR-TEM images for LSCF50/50GDC mesoporous films heat-treated at 500°C. To evaluate the distribution, the size of ~80 particles has been measured.

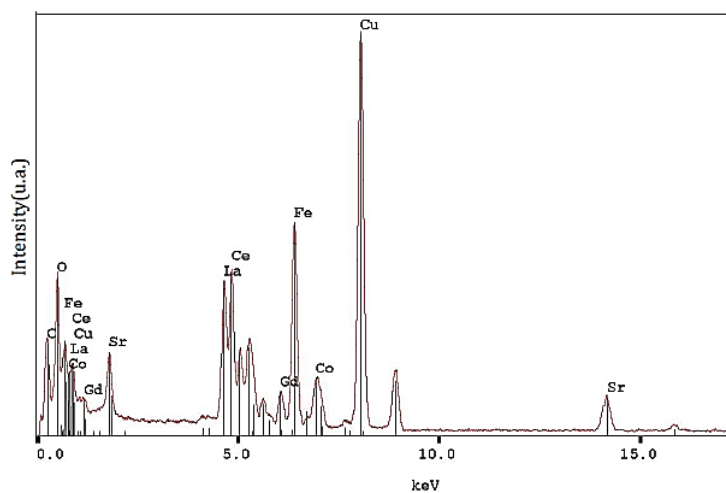

**Figure S5:** EDX spectrum of LSCF70/30GDC calcined at 700°C in air during 5h.

**Tableau 1.** Experimental atomic percentages means of La, Sr, Co, Fe, Ce and Gd measured by EDX and theoretical atomic percentages (xx) calculated for porous thin films of LSCF/GDC with 30%, 70% and 100% LSCF volume. The calculated error is equal to 0.5%.

| Theoretical x/y   | 30/70                                                                                                                                        | 70/30                                                                                                                                          | 100/0                                                                                      |
|-------------------|----------------------------------------------------------------------------------------------------------------------------------------------|------------------------------------------------------------------------------------------------------------------------------------------------|--------------------------------------------------------------------------------------------|
| La, at%           | 6.1 (6.9)                                                                                                                                    | 17.8 (18.6)                                                                                                                                    | 29.2 (30.0)                                                                                |
| Sr, at%           | 5.0 (4.6)                                                                                                                                    | 13.7 (12.4)                                                                                                                                    | 21.0 (20.0)                                                                                |
| Co, at%           | 2.5 (2.3)                                                                                                                                    | 6.2 (6.2)                                                                                                                                      | 10.5 (10.0)                                                                                |
| Fe, at%           | 8.6 (9.2)                                                                                                                                    | 25.4 (24.8)                                                                                                                                    | 39.5 (40.0)                                                                                |
| Ce, at%           | 69.7 (69.3)                                                                                                                                  | 32.5 (34.2)                                                                                                                                    | -                                                                                          |
| Gd, at%           | 8.1 (7.7)                                                                                                                                    | 4.4 (3.8)                                                                                                                                      | -                                                                                          |
| x / y             | 29.2 / 70.8                                                                                                                                  | 71.0 / 29.0                                                                                                                                    | 100.0 / 0.0                                                                                |
| Final composition | $\text{La}_{0.56}\text{Sr}_{0.44}\text{Co}_{0.23}\text{Fe}_{0.77}\text{O}_{3-\delta}$<br>$\text{Ce}_{0.9}\text{Gd}_{0.1}\text{O}_{2-\delta}$ | $\text{La}_{0.56}\text{Sr}_{0.44}\text{Co}_{0.20}\text{Fe}_{0.80}\text{O}_{3-\delta}$<br>$\text{Ce}_{0.88}\text{Gd}_{0.12}\text{O}_{2-\delta}$ | $\text{La}_{0.58}\text{Sr}_{0.42}\text{Co}_{0.21}\text{Fe}_{0.79}\text{O}_{3-\delta}$<br>- |

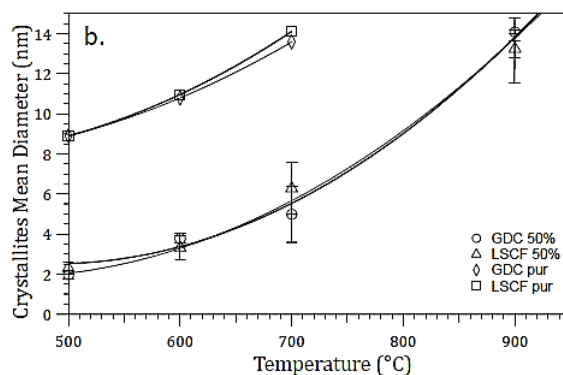

**Figure S6:** The average crystallite size for LSCF and GDC measured by *ex situ* XRD analysis of LSCF50/50GDC, pure GDC and pure LSCF thin films calcined at various temperatures.
